# Supplementary material for: Immunohistochemical Pattern of Histone H2A Variant Expression in an Experimental Model of Ischemia–Reperfusion-Induced Acute Kidney Injury
Source: MDPI journal article supplement (doi:10.3390/ijms24098085), 2023-04-30
Supplement: s1 [file s1]

**Supplementary Materials:**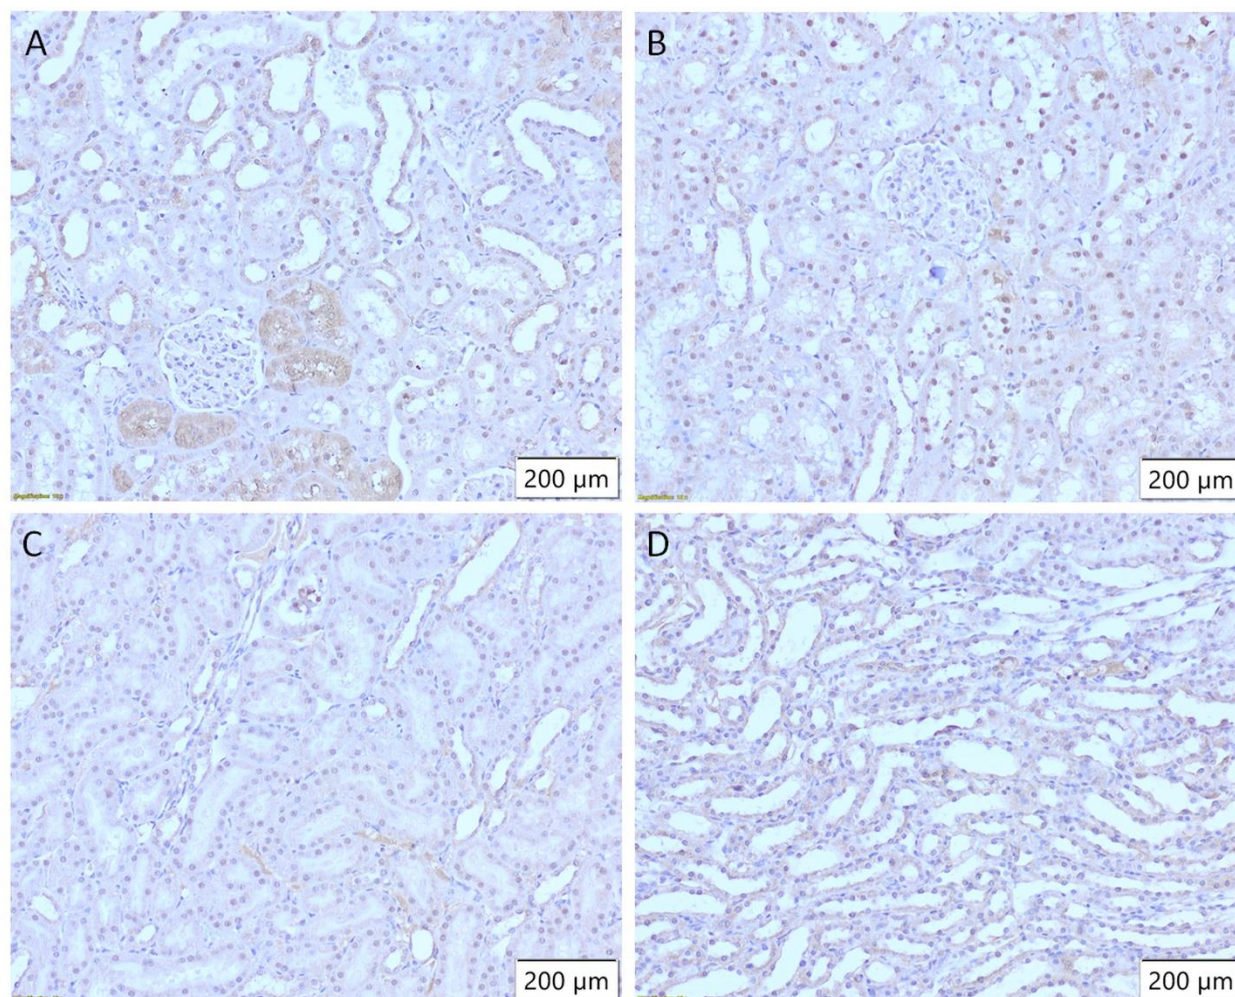

**Figure S1:** Immunohistochemical nuclear expression of histone  $\gamma$ H2AX(S139) in sham-operated Wistar rats. A) expression in subcapsular kidney cortex involving the majority of nuclei of proximal tubulocytes; B) expression in the middle cortical zone detected in the same structures; C) juxtamedullary cortical zone with nuclear positivity in less than 25% of tubulocytes; D) the absence of expression in the kidney medulla.

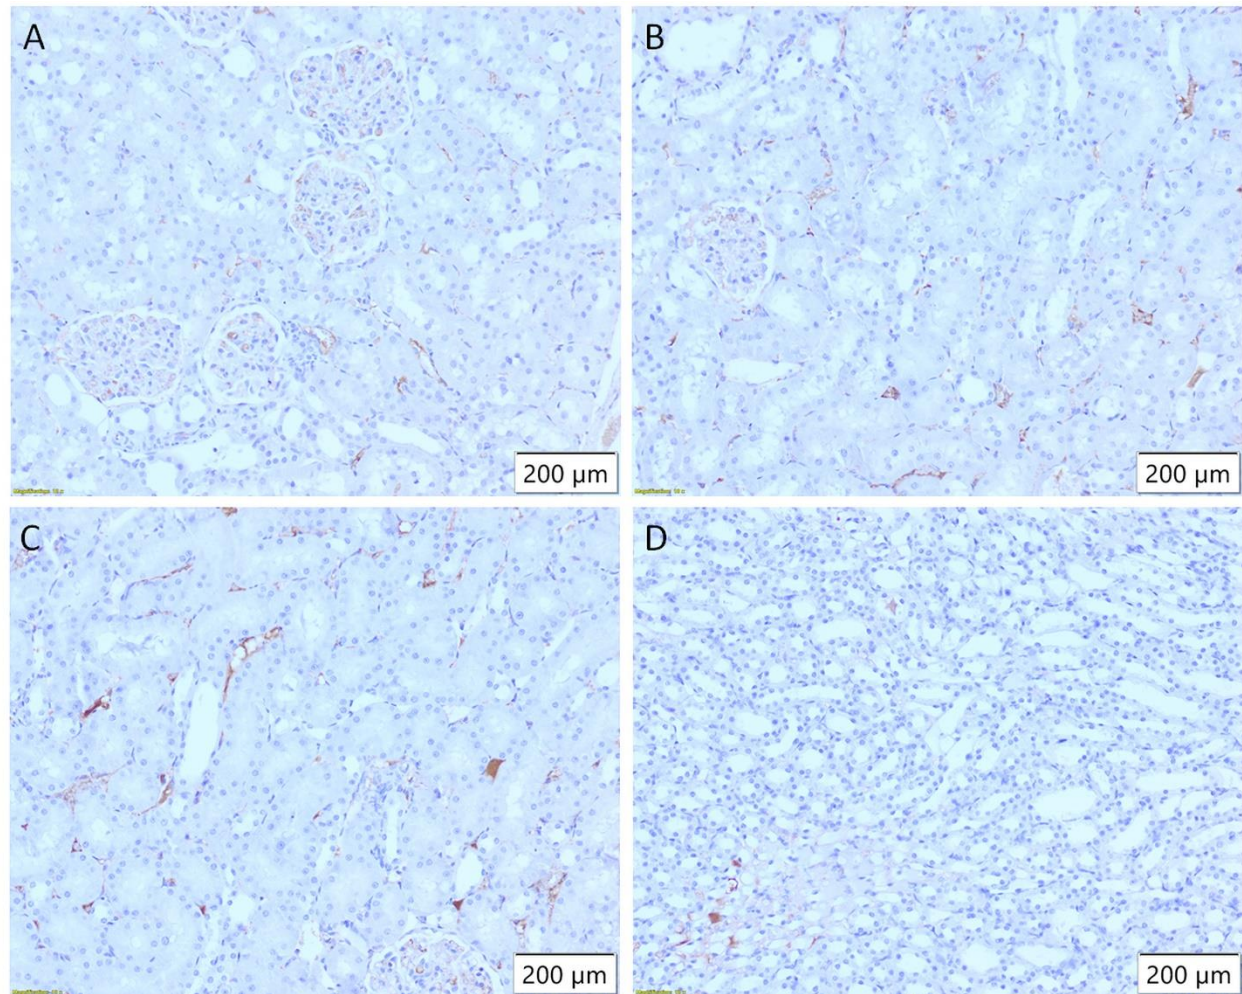

**Figure S2:** The absence of immunohistochemical nuclear expression of histone H2AX Y142ph in sham-operated Wistar rats. A) subcapsular kidney cortex; B) middle cortical zone; C) juxtamedullary cortical zone; D) kidney medulla.



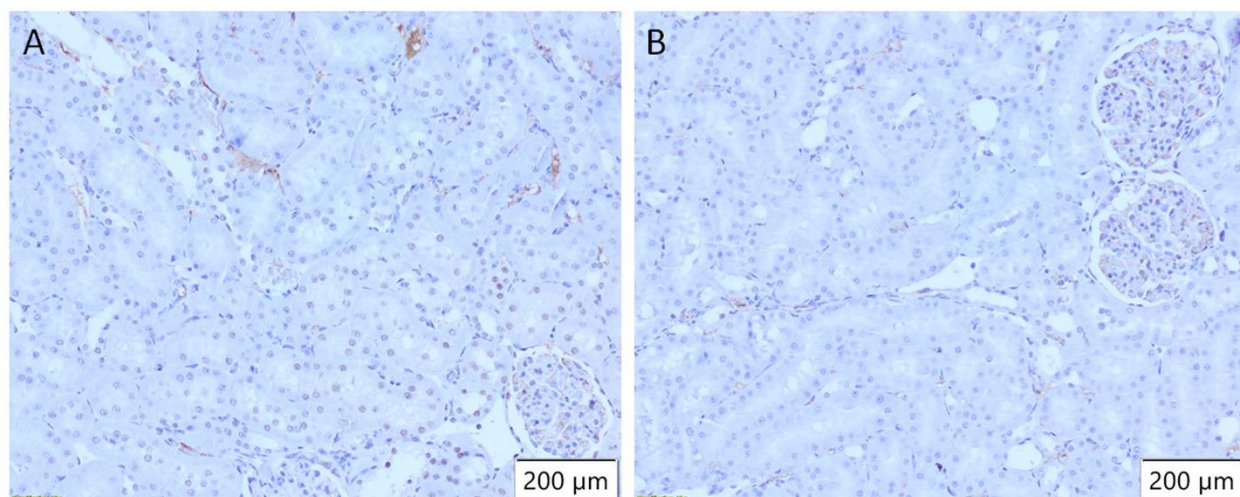

**Figure S3:** Immunohistochemical detection of histone H2AX and H2AZ in Wistar rats. A) nuclear expression of histone H2AX in some tubulocytes; B) the absence of expression of H2AZ histone.

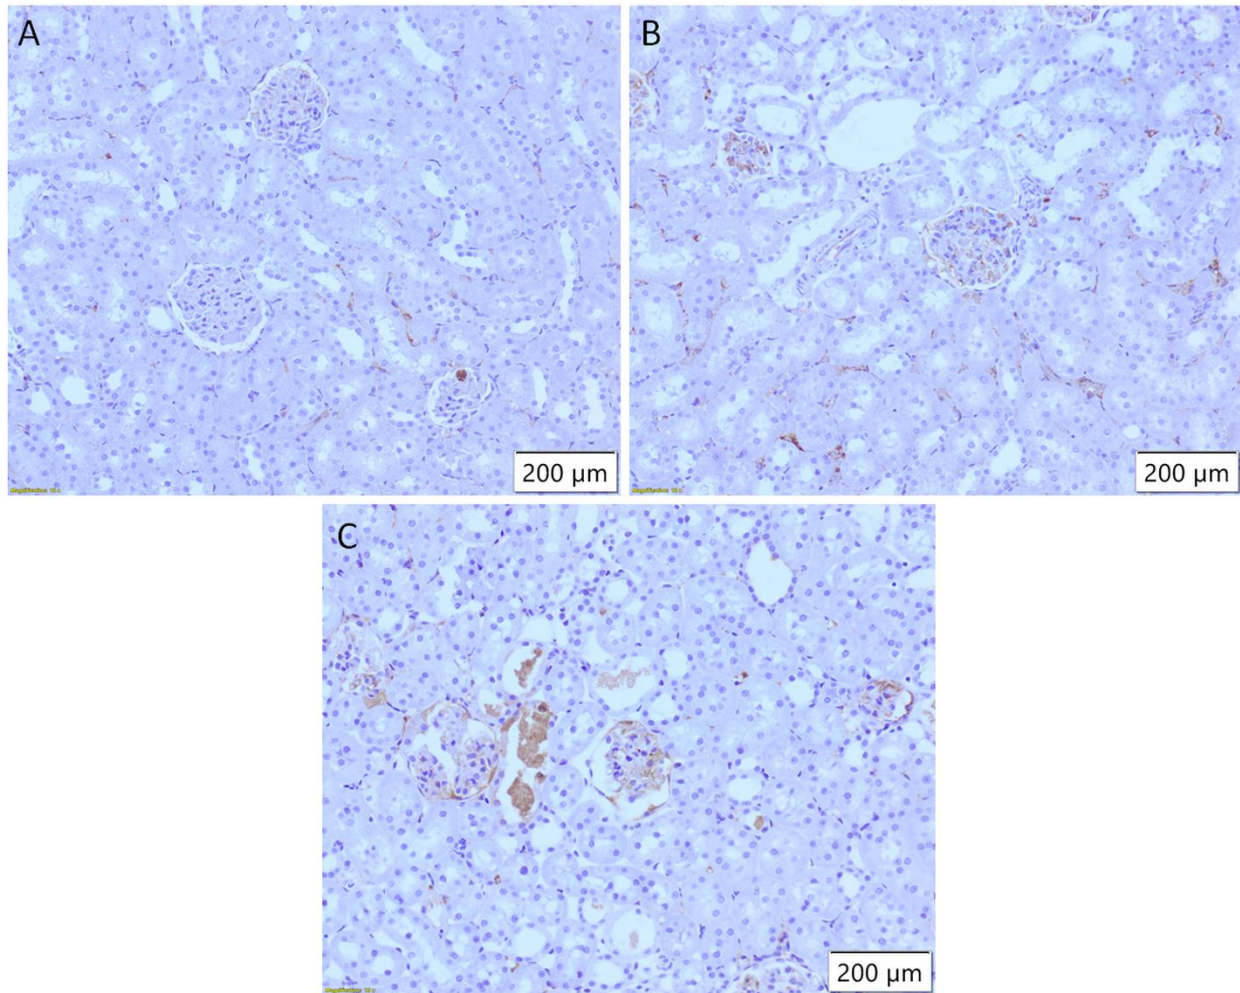

**Figure S4:** Negative controls for immunohistochemical analyses in investigated animal groups. A) Wistar rat sham- operated kidney; B) SHR rat sham-operated kidney; C) SHR rat with induced AKI showed unspecific DAB binding to necrotic material within tubular luminal area, but without any nuclear staining.
